# Supplementary material for: Transcripts of sulphur metabolic genes are co-ordinately regulated in developing seeds of common bean lacking phaseolin and major lectins
Source: PubMed Central journal article supplement — J Exp Bot. 2012 Oct 15;63(17):6283–95. doi: 10.1093/jxb/ers280 (PMC3481216; doi:10.1093/jxb/ers280), 2012-10-15
Supplement: supp_ers280_jexbot083311_file001.pdf [file supp_ers280_jexbot083311_file001.pdf]

**Table S1.** Primers used for RT-quantitative PCR validation of differentially expressed genes from microarray data

| Enzyme                                     | Gene            | Contig              | Protein              | Forward primer                  | Reverse primer                   |
|--------------------------------------------|-----------------|---------------------|----------------------|---------------------------------|----------------------------------|
| Sulfate adenylyltransferase                | <i>ATPS1</i>    | CL238Contig2        | Phvulv091023286m     | 5'-GTCCCACTTGATTGGAGAATGAAAC-3' | 5'-GGTCCAGCATAGTGCATGGGAGA-3'    |
| Adenylyl sulfate reductase                 | <i>APSR1</i>    | CL1146Contig2       | Phvulv091014626m     | 5'-CGACCAATCAAGTACCCTTCTG-3'    | 5'-TGCTACCAAAACTGCCATCATC-3'     |
| Sulfite reductase                          | <i>SIR</i>      | -                   | Phvulv091016899m     | 5'-TGGCGACTTCACAAACAGACTG-3'    | 5'-GTATCCTCCTTGACTGAGTAAATGG-3'  |
| Sulfite oxidase                            | <i>SO</i>       | CL6806Contig1       | Phvulv091007084m     | 5'-TTGTTCTGGTGTGTCATTGGA-3'     | 5'-CTGCGGGTAGACCAATCAAT-3'       |
| Serine acetyltransferase                   | <i>SERAT1;1</i> | PVUSE3NG_RP_008_F02 | Phvulv091024096m     | 5'-ACCATACTTCCTTTATCTCTGAGTG-3' | 5'-CAGTATATGTA CTCTCAGCAGTAAC-3' |
|                                            | <i>SERAT1;2</i> | PVUSE3NG_RP_008_F02 | Phvulv091017245m     | 5'-ACCATACTTCCTTTATCTCTGAGTG-3' | 5'-CAAAGCAATAATCAACCTTTTCATAC-3' |
|                                            | <i>SERAT2;1</i> | CL1591Contig1       | Phvulv091018072m     | 5'-ACAACCCCTCTTCTCGCAAG-3'      | 5'-GAACTCAAGAACACCAAGACCATC-3'   |
| Cystathionine $\beta$ -lyase               | <i>CBL</i>      | CL6595Contig1       | Phvulv091030867m     | 5'-GTTGGCTTTGTATGCGAGGAATC-3'   | 5'-TGAAAGTGCCAGTGAACCAG-3'       |
| Homocysteine S-methyltransferase           | <i>HMT3</i>     | CL2920Contig1       | Phvulv091009184m     | 5'-TCAAGTGGGTTAGCAGAGGAT-3'     | 5'-CATATATTGCCTCCGCTATG-3'       |
| Methionine $\gamma$ -lyase                 | <i>MGL1</i>     | CL2938Contig2       | Phvulv091009184m     | 5'-GTGCTGATGTGGTGGTTAC-3'       | 5'-CCACCTTGGGTTTCATCGTA-3'       |
| Branched-chain-amino-acid aminotransferase | <i>BCAT1</i>    | CL2797Contig2       | Phvulv091000898m     | 5'-TGGCTCCTGCACCTGAATACACAT-3'  | 5'-AAGCACGGTCAAAGTTCTCCTCCA-3'   |
| Tyrosine aminotransferase                  | <i>TAT</i>      | CL481Contig1        | Phvulv091026436m/-7m | 5'-ACTGCAAAACGGGTTGGAACA-3'     | 5'-GATGAAAGTGGCTGGACCTCCCA-3'    |
| Selenium binding protein                   | <i>SBP</i>      | CL360Contig1        | Phvulv091015749m     | 5'-ACAGGTTTTGTTGGGAGTGC-3'      | 5'-ATGTCCTCAATGTTATATTGCCTT-3'   |
| Ubiquitin                                  | -               | CL1Contig148        | Phvulv091024910m     | 5'-ACAGCTGGAGGATGAAAGGA-3'      | 5'-GTCCGAACTCTCCACCTCAA-3'       |
